# Supplementary material
Source: PubMed Central journal article supplement (PMC4136220)
Supplement: IAI.01832-14_zii999090813so1.pdf [file IAI.01832-14_zii999090813so1.pdf]

**Table S1.** Oligonucleotide primer sequences

| <b>Primer</b>    | <b>Gene</b>                  | <b>Experiment</b>      | <b>Direction</b> | <b>Sequence</b>                      |
|------------------|------------------------------|------------------------|------------------|--------------------------------------|
| SBP1-5′          | <i>sbp1</i>                  | Cloning                | forward          | ATATATATCCATGGAACCAAAGAAGAAACCAGCACC |
| SBP1-3′          | <i>sbp1</i>                  | Cloning                | reverse          | TCTCTCGGATCCTAAAGCTGCATCAAACCTCAGC   |
| SBP2-5′          | <i>sbp2</i>                  | Cloning                | forward          | TCTCTCCATGGAAGCAATGAGTCTACGACCAAT    |
| SBP2-3′          | <i>sbp2</i>                  | Cloning                | reverse          | CTCTGGATCCTTGACCTAATGCTTGGCTGTT      |
| SBP3-5′          | <i>sbp3</i>                  | Cloning                | forward          | TCTCTCCATGGAAGCGGTCAAACGAACAAAGC     |
| SBP3-3′          | <i>sbp3</i>                  | Cloning                | reverse          | TCTCTGGATCCTTCAATATTAGTTGGCATAACC    |
| SBP123kanmutup5′ | <i>sbp123</i><br><i>sbp1</i> | Mutant<br>construction | forward          | TATTTGCTTCTCCGATACCCA                |
| SBP123kanmutup3′ | <i>sbp123</i><br><i>sbp1</i> | Mutant<br>construction | reverse          | TAGTTAGTCAGATAATTCCTTGGGTTAATA       |
| SBP123kan5′      | <i>sbp123</i><br><i>sbp1</i> | Mutant<br>construction | forward          | AGGAATTATCTGACTAACTAGGAGGAATAA       |

|                  |                              |                        |         |                                |
|------------------|------------------------------|------------------------|---------|--------------------------------|
| SBP123kan3'      | <i>sbp123</i><br><i>sbp3</i> | Mutant<br>construction | reverse | GTCTTATTCACATTATTCCTCCAGGTACT  |
| SBP123kanmutdn5' | <i>sbp123</i>                | Mutant<br>construction | forward | AGGGAATAATGTGAATAAGACTGCCAAAAA |
| SBP123kanmutdn3' | <i>sbp123</i>                | Mutant<br>construction | reverse | AAGCACAAGACAGGACCACA           |
| SBP1kan3'        | <i>sbp1</i>                  | Mutant<br>construction | reverse | TGTGCCAAACCATTATTCCTCCAGGTACT  |
| SBP1kanmutdn5'   | <i>sbp1</i>                  | Mutant<br>construction | forward | GGGAATAATGGTTTGGCACACCTACTTTTG |
| SBP1kanmutdn3'   | <i>sbp1</i>                  | Mutant<br>construction | reverse | ATTGTTGGTACATTTAGTAT           |
| SBP2kanmutup5'   | <i>sbp2</i>                  | Mutant<br>construction | forward | GTTTTGCTCGTGAAGTCTCAA          |
| SBP2kanmutup3'   | <i>sbp2</i>                  | Mutant                 | reverse | TAGTTAGTCACTCTTAATATGCTTAATATG |

|                |                                |                                                         |         |                                 |
|----------------|--------------------------------|---------------------------------------------------------|---------|---------------------------------|
|                |                                | construction                                            |         |                                 |
| SBP2kan5´      | <i>sbp2</i>                    | Mutant<br>construction                                  | forward | ATATTAAGAGTGACTAACTAGGAGGAATAA  |
| SBP2kan3´      | <i>sbp2</i>                    | Mutant<br>construction                                  | reverse | CGGCTTAAAACATTATCCCTCCAGGTACT   |
| SBP2kanmutdn5´ | <i>sbp2</i>                    | Mutant<br>construction                                  | forward | GGGAATAATGTTTTAAGCCGATGGTGTTTG  |
| SBP2kanmutdn3´ | <i>sbp2</i>                    | Mutant<br>construction                                  | reverse | CTTAGCCAATCATTAAAAG             |
| SBP3kanmutup5´ | <i>sbp3</i><br><br><i>sbp2</i> | Mutant<br>construction<br><br><i>sbp2</i><br>sequencing | forward | GCGGTAAATTGGCAGAAATTG           |
| SBP3kanmutup3´ | <i>sbp3</i>                    | Mutant<br>construction                                  | reverse | TAGTTAGTCAAATCTACTCCTTGATTTGGTG |

|                |             |                           |         |                                |
|----------------|-------------|---------------------------|---------|--------------------------------|
| SBP3kan5'      | <i>sbp3</i> | Mutant<br>construction    | forward | GGAGTAGATTTGACTAACTAGGAGGAATAA |
| SBP3kanmutdn5' | <i>sbp3</i> | Mutant<br>construction    | forward | GGGAATAATGTGAATAAGACTGCCAAAAAG |
| SBP3kanmutdn3' | <i>sbp3</i> | Mutant<br>construction    | reverse | CAAAGCACAAGACAGGACCAC          |
| P14-S2-R       | <i>sbp2</i> | <i>sbp2</i><br>sequencing | reverse | CTAAATGTACCAACAATGGCTG         |

**Table S2.** Comparison of *sbp2* sequence (804bp/267aa) between *M. catarrhalis* strain O35E and clinical isolates

| Clinical source (n)                            | Total<br>number of<br>isolates | Nucleotide position |      |     |       |
|------------------------------------------------|--------------------------------|---------------------|------|-----|-------|
|                                                |                                | 97                  | 244  | 615 | 769   |
| AOM(2), COPD(2), NP(3) <sup>a</sup>            | n= 7                           | G                   | G    | C   | G     |
| AOM(6), COPD(8), NP(5) <sup>b</sup>            | n=19                           | A                   | G    | T   | G     |
| AOM(1), COPD(0), NP(1)                         | n= 2                           | G                   | A    | C   | G     |
| AOM(1), COPD(0), NP(1)                         | n= 2                           | G                   | G    | C   | A     |
| <b>Substitution of amino acid <sup>c</sup></b> |                                | A33T                | A82T | -   | A257T |

<sup>a</sup> *sbp2* sequence of strain O35E is identical.

AOM, acute otitis media; COPD, chronic obstructive pulmonary disease; NP, nasopharynx

<sup>b</sup> *sbp2* sequence of strain BBH18 is identical.

<sup>c</sup> A, alanine; T, threonine
